# Supplementary material for: Gene alterations as predictors of radiation-induced toxicity in head and neck squamous cell carcinoma
Source: PubMed Central journal article supplement (PMC8130372; doi:10.1186/s12967-021-02876-5), 2021-05-17
Supplement: 12967_2021_2876_MOESM1_ESM.pdf [file 12967_2021_2876_MOESM1_ESM.pdf]

Supplementary Figures.

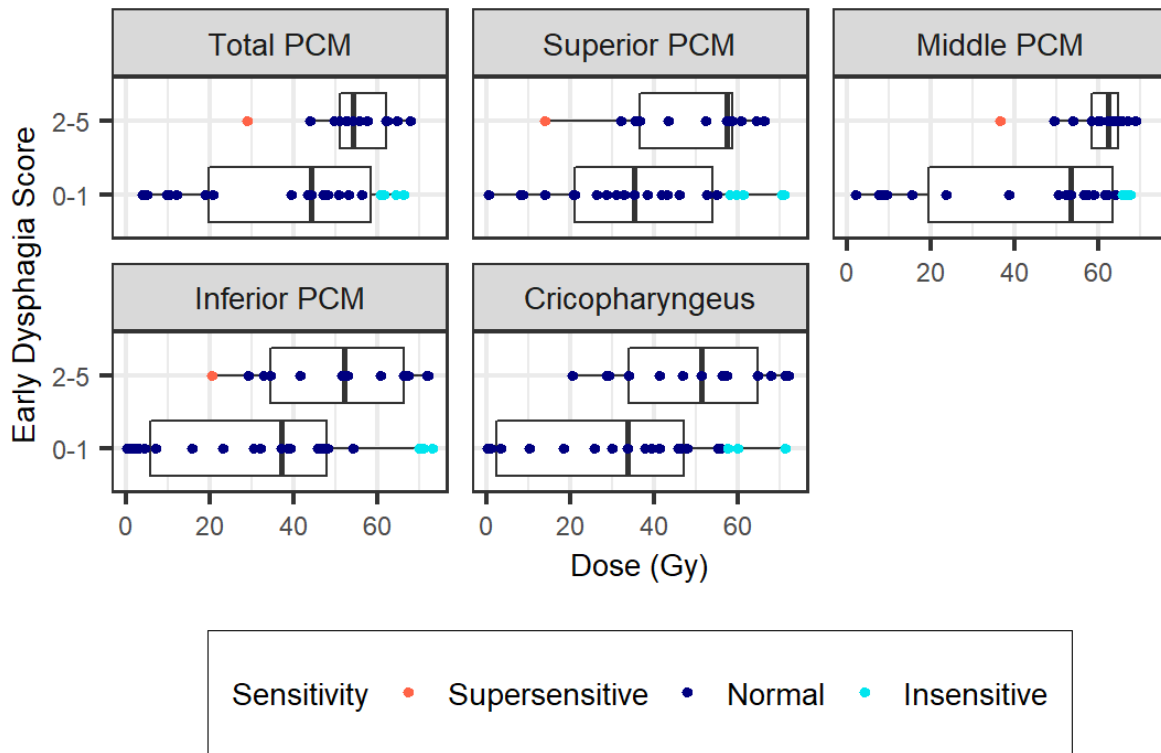

**Figure S1.** Early Dysphagia by RT Sensitivity. Mean doses to structures associated with early dysphagia versus early dysphagia outcomes for 36 patients are plotted. For a particular metric, patients were identified as sensitive if they received low dose (defined as a mean dose less than the 1st quartile dose value for the entire cohort) yet had poor outcomes (grade 2-5). Patients were identified as insensitive if they received high dose (defined as a mean dose greater than the 3rd quartile dose value for the entire cohort) yet had good outcomes (grade 0-1). Patients who were supersensitive or insensitive for more than two structures were selected as overall supersensitive or insensitive for further genetic analysis. Only 1 patient was identified as overall supersensitive and 8 patients were identified as overall insensitive. Thus a larger overall cohort is needed to investigate genetic differences between supersensitive and insensitive patients for this outcome.

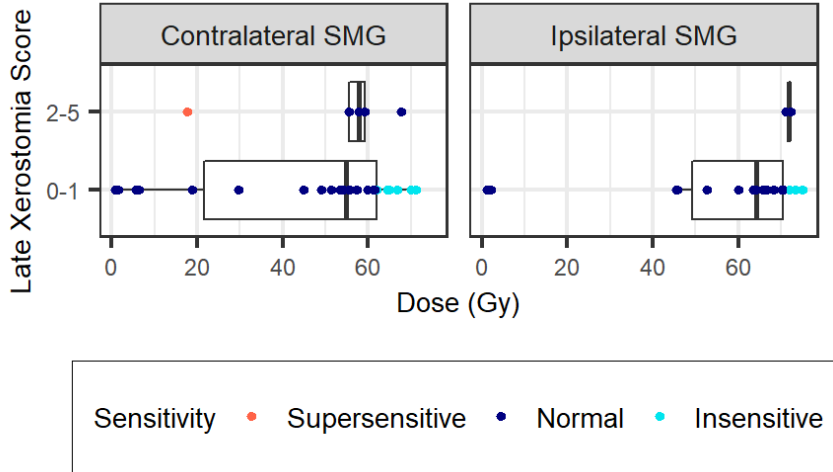

**Figure S2.** Late Xerostomia by RT Sensitivity. Mean doses to structures associated with late xerostomia versus late xerostomia outcomes for 36 patients are plotted. For a particular metric, patients were identified as sensitive if they received low dose (defined as a mean dose less than the 1st quartile dose value for the entire cohort) yet had poor outcomes (grade 2-5). Patients were identified as insensitive if they received high dose (defined as a mean dose greater than the 3rd quartile dose value for the entire cohort) yet had good outcomes (grade 0-1). Patients who were supersensitive or insensitive for more than two structures were selected as overall supersensitive or insensitive for further genetic analysis. Only 1 patient was identified as overall supersensitive while 2 patients were identified as overall insensitive. Thus a larger overall cohort is needed to investigate genetic differences between supersensitive and insensitive patients for this outcome.

Supplementary Tables.

**Table S1.** Differentially altered genes.

| Gene                    | % Mutation in Group A | % Mutation in Group C | % Mutation in remaining |
|-------------------------|-----------------------|-----------------------|-------------------------|
|                         | (supersensitive, n=6) | (Insensitive, n=7)    | Cohort (n=24)           |
| BRCA2                   | 0                     | 28.6                  | 25.81                   |
| ATR                     | 16.7                  | 28.6                  | 12.5                    |
| ERBB3                   | 0                     | 0                     | 20.8                    |
| TP53                    | 50                    | 42.9                  | 75                      |
| NOTCH1                  | 0                     | 14.3                  | 37.5                    |
| PIK3CA                  | 0                     | 28.6                  | 25                      |
| CDKN2A                  | 83.3                  | 42.9                  | 54.2                    |
| CASP8                   | 33.3                  | 0                     | 16.7                    |
| NFE2L2                  | 16.7                  | 0                     | 12.5                    |
| CCND1                   | 16.7                  | 14.3                  | 33.3                    |
| ESR1                    | 0                     | 28.6                  | 16.6                    |
| FAT1                    | 66.7                  | 28.6                  | 37.5                    |
| <b>Group</b>            | <b>% HPV Positive</b> |                       |                         |
| A (supersensitive, n=6) | 33.33                 |                       |                         |
| C (insensitive, n=7)    | 71.43                 |                       |                         |

**Table S2.** Supersensitive group gene variants.

| Gene     | Group A (n=6)<br>Supersensitive | Remaining<br>Cohort (n=31) | Diff        | Gene    | Group A (n=6)<br>Supersensitive | Remaining<br>Cohort (n=31) | Diff        |
|----------|---------------------------------|----------------------------|-------------|---------|---------------------------------|----------------------------|-------------|
| TNFAIP3  | 33.33333333                     | 0                          | 33.33333333 | GNAS    | 0                               | 16.12903226                | 16.12903226 |
| MLL3     | 0                               | 32.25806452                | 32.25806452 | GPR124  | 0                               | 16.12903226                | 16.12903226 |
| NOTCH1   | 0                               | 32.25806452                | 32.25806452 | IKZF1   | 0                               | 16.12903226                | 16.12903226 |
| CDKN2A   | 83.33333333                     | 51.61290323                | 31.72043011 | MAP3K13 | 0                               | 16.12903226                | 16.12903226 |
| HNF1A    | 33.33333333                     | 3.225806452                | 30.10752688 | MYC     | 0                               | 16.12903226                | 16.12903226 |
| MAP3K1   | 33.33333333                     | 3.225806452                | 30.10752688 | PRKCI   | 0                               | 16.12903226                | 16.12903226 |
| FGF3     | 0                               | 29.03225806                | 29.03225806 | SPEN    | 0                               | 16.12903226                | 16.12903226 |
| MLL2     | 0                               | 29.03225806                | 29.03225806 | NOTCH2  | 33.33333333                     | 19.35483871                | 13.97849462 |
| FAT1     | 66.66666667                     | 38.70967742                | 27.95698925 | AKT2    | 16.66666667                     | 3.225806452                | 13.44086022 |
| BRCA2    | 0                               | 25.80645161                | 25.80645161 | BCOR    | 16.66666667                     | 3.225806452                | 13.44086022 |
| FGF19    | 0                               | 25.80645161                | 25.80645161 | BLM     | 16.66666667                     | 3.225806452                | 13.44086022 |
| FAT3     | 0                               | 22.58064516                | 22.58064516 | FAM46C  | 16.66666667                     | 3.225806452                | 13.44086022 |
| CASP8    | 33.33333333                     | 12.90322581                | 20.43010753 | MEN1    | 16.66666667                     | 3.225806452                | 13.44086022 |
| BCL6     | 0                               | 19.35483871                | 19.35483871 | MKNK1   | 16.66666667                     | 3.225806452                | 13.44086022 |
| ESR1     | 0                               | 19.35483871                | 19.35483871 | MST1R   | 16.66666667                     | 3.225806452                | 13.44086022 |
| FGF4     | 0                               | 19.35483871                | 19.35483871 | ALK     | 0                               | 12.90322581                | 12.90322581 |
| KLHL6    | 0                               | 19.35483871                | 19.35483871 | EPHA6   | 0                               | 12.90322581                | 12.90322581 |
| SOX2     | 0                               | 19.35483871                | 19.35483871 | EPHB4   | 0                               | 12.90322581                | 12.90322581 |
| TP53     | 50                              | 67.74193548                | 17.74193548 | FBXW7   | 0                               | 12.90322581                | 12.90322581 |
| SPTA1    | 33.33333333                     | 16.12903226                | 17.20430108 | FGFR1   | 0                               | 12.90322581                | 12.90322581 |
| DDR2     | 16.66666667                     | 0                          | 16.66666667 | IRS2    | 0                               | 12.90322581                | 12.90322581 |
| FANCA    | 16.66666667                     | 0                          | 16.66666667 | KDM5A   | 0                               | 12.90322581                | 12.90322581 |
| FANCI    | 16.66666667                     | 0                          | 16.66666667 | MED12   | 0                               | 12.90322581                | 12.90322581 |
| FGF23    | 16.66666667                     | 0                          | 16.66666667 | NF1     | 0                               | 12.90322581                | 12.90322581 |
| GEN1     | 16.66666667                     | 0                          | 16.66666667 | PARP2   | 0                               | 12.90322581                | 12.90322581 |
| HRAS     | 16.66666667                     | 0                          | 16.66666667 | RAC1    | 0                               | 12.90322581                | 12.90322581 |
| HSP90AA1 | 16.66666667                     | 0                          | 16.66666667 | RPTOR   | 0                               | 12.90322581                | 12.90322581 |
| PARP1    | 16.66666667                     | 0                          | 16.66666667 | SNCAIP  | 0                               | 12.90322581                | 12.90322581 |
| REL      | 16.66666667                     | 0                          | 16.66666667 | TERC    | 0                               | 12.90322581                | 12.90322581 |
| SOCS1    | 16.66666667                     | 0                          | 16.66666667 | TIPARP  | 0                               | 12.90322581                | 12.90322581 |
| TNKS2    | 16.66666667                     | 0                          | 16.66666667 | ZNF703  | 0                               | 12.90322581                | 12.90322581 |
| BRD4     | 0                               | 16.12903226                | 16.12903226 | CCND1   | 16.66666667                     | 29.03225806                | 12.3655914  |
| ERBB3    | 0                               | 16.12903226                | 16.12903226 |         |                                 |                            |             |

**Table S3. Gene variants.**

| Gene     | Group A (n=6)  |             | Gene    | Group A (n=6)  |             | Gene    | Group A (n=6)  |             |
|----------|----------------|-------------|---------|----------------|-------------|---------|----------------|-------------|
|          | Supersensitive | Insensitive |         | Supersensitive | Insensitive |         | Supersensitive | Insensitive |
| KLHL6    | 0              | 42.85714286 | MEN1    | 16.66666667    | 0           | HSD3B1  | 0              | 14.28571429 |
| MAP3K13  | 0              | 42.85714286 | MKNK1   | 16.66666667    | 0           | IKBKE   | 0              | 14.28571429 |
| SOX2     | 0              | 42.85714286 | MLL     | 16.66666667    | 0           | IKZF1   | 0              | 14.28571429 |
| CDKN2A   | 83.33333333    | 42.85714286 | MST1R   | 16.66666667    | 0           | IRS2    | 0              | 14.28571429 |
| HPV      | 33.33333333    | 71.42857143 | NFE2L2  | 16.66666667    | 0           | KDM5A   | 0              | 14.28571429 |
| FAT1     | 66.66666666    | 28.57142857 | NTRK3   | 16.66666667    | 0           | KEAP1   | 0              | 14.28571429 |
| CASP8    | 33.33333333    | 0           | PARP1   | 16.66666667    | 0           | LTK     | 0              | 14.28571429 |
| HNF1A    | 33.33333333    | 0           | REL     | 16.66666667    | 0           | MEF2B   | 0              | 14.28571429 |
| SPTA1    | 33.33333333    | 0           | RICTOR  | 16.66666667    | 0           | MITF    | 0              | 14.28571429 |
| TERT     | 33.33333333    | 0           | RNF43   | 16.66666667    | 0           | MRE11A  | 0              | 14.28571429 |
| TNFAIP3  | 33.33333333    | 0           | SOCS1   | 16.66666667    | 0           | MYCN    | 0              | 14.28571429 |
| BCL6     | 0              | 28.57142857 | TNKS2   | 16.66666667    | 0           | NF1     | 0              | 14.28571429 |
| BRCA2    | 0              | 28.57142857 | TSC2    | 16.66666667    | 0           | NKX2-1  | 0              | 14.28571429 |
| BRD4     | 0              | 28.57142857 | VEGFA   | 16.66666667    | 0           | NOTCH1  | 0              | 14.28571429 |
| ESR1     | 0              | 28.57142857 | ABL2    | 0              | 14.28571429 | NOTCH3  | 0              | 14.28571429 |
| GPR124   | 0              | 28.57142857 | ACVR1B  | 0              | 14.28571429 | NSD1    | 0              | 14.28571429 |
| GSK3B    | 0              | 28.57142857 | AURKA   | 0              | 14.28571429 | PAK7    | 0              | 14.28571429 |
| MLL3     | 0              | 28.57142857 | BCL2L2  | 0              | 14.28571429 | PARP2   | 0              | 14.28571429 |
| PIK3CB   | 0              | 28.57142857 | CCNE1   | 0              | 14.28571429 | PARP4   | 0              | 14.28571429 |
| PRKCI    | 0              | 28.57142857 | CD79A   | 0              | 14.28571429 | PIK3C2B | 0              | 14.28571429 |
| SNCAIP   | 0              | 28.57142857 | CDK12   | 0              | 14.28571429 | PIK3R2  | 0              | 14.28571429 |
| SUFU     | 0              | 28.57142857 | CDK6    | 0              | 14.28571429 | PLCG2   | 0              | 14.28571429 |
| TERC     | 0              | 28.57142857 | CDKN1A  | 0              | 14.28571429 | PNRC1   | 0              | 14.28571429 |
| TIPARP   | 0              | 28.57142857 | CUL4A   | 0              | 14.28571429 | POLE    | 0              | 14.28571429 |
| ZNF703   | 0              | 28.57142857 | EGFR    | 0              | 14.28571429 | RAD50   | 0              | 14.28571429 |
| MAP3K13  | 33.33333333    | 14.28571429 | EPHA5   | 0              | 14.28571429 | RAD51B  | 0              | 14.28571429 |
| NOTCH2   | 33.33333333    | 14.28571429 | EPHA6   | 0              | 14.28571429 | RANBP2  | 0              | 14.28571429 |
| AKT2     | 16.66666667    | 0           | EPHB1   | 0              | 14.28571429 | RBM10   | 0              | 14.28571429 |
| AR       | 16.66666667    | 0           | EPHB4   | 0              | 14.28571429 | STAT3   | 0              | 14.28571429 |
| ARID1B   | 16.66666667    | 0           | ERRFI1  | 0              | 14.28571429 | STK11   | 0              | 14.28571429 |
| ARID2    | 16.66666667    | 0           | FAM123B | 0              | 14.28571429 | TEK     | 0              | 14.28571429 |
| ASXL1    | 16.66666667    | 0           | FANCE   | 0              | 14.28571429 | TOP2A   | 0              | 14.28571429 |
| CSF1R    | 16.66666667    | 0           | FANCL   | 0              | 14.28571429 | TP53BP1 | 0              | 14.28571429 |
| DDR2     | 16.66666667    | 0           | FANCM   | 0              | 14.28571429 | TRRAP   | 0              | 14.28571429 |
| DIS3     | 16.66666667    | 0           | FGF10   | 0              | 14.28571429 | WHSC1L1 | 0              | 14.28571429 |
| EP300    | 16.66666667    | 0           | FGF12   | 0              | 14.28571429 | XPO1    | 0              | 14.28571429 |
| FAM46C   | 16.66666667    | 0           | FGF14   | 0              | 14.28571429 | ZNRF3   | 0              | 14.28571429 |
| FANCA    | 16.66666667    | 0           | FGF19   | 0              | 14.28571429 | ATR     | 16.66666667    | 28.57142857 |
| FANCI    | 16.66666667    | 0           | FGF3    | 0              | 14.28571429 | PIK3CA  | 16.66666667    | 28.57142857 |
| FGF23    | 16.66666667    | 0           | FGF4    | 0              | 14.28571429 | PTCH1   | 16.66666667    | 28.57142857 |
| GALNT12  | 16.66666667    | 0           | FGFR1   | 0              | 14.28571429 | PTPRD   | 16.66666667    | 28.57142857 |
| GEN1     | 16.66666667    | 0           | FH      | 0              | 14.28571429 | RET     | 16.66666667    | 28.57142857 |
| HRAS     | 16.66666667    | 0           | GNA11   | 0              | 14.28571429 | TP53BP1 | 50             | 42.85714286 |
| HSP90AA1 | 16.66666667    | 0           | GNA13   | 0              | 14.28571429 | CDKN2B  | 33.33333333    | 28.57142857 |
| KDR      | 16.66666667    | 0           | GNAS    | 0              | 14.28571429 |         |                |             |
